# Supplementary material for: Forecasting Healthy Life Expectancy Among Chilean Community-Dwelling Older Adults With and Without Sarcopenia
Source: PubMed Central journal article supplement (PMC8889119; doi:10.3389/fmed.2022.841810), 2022-02-16

## Flow chart of the sample inclusion, exclusion, and loss to follow-up

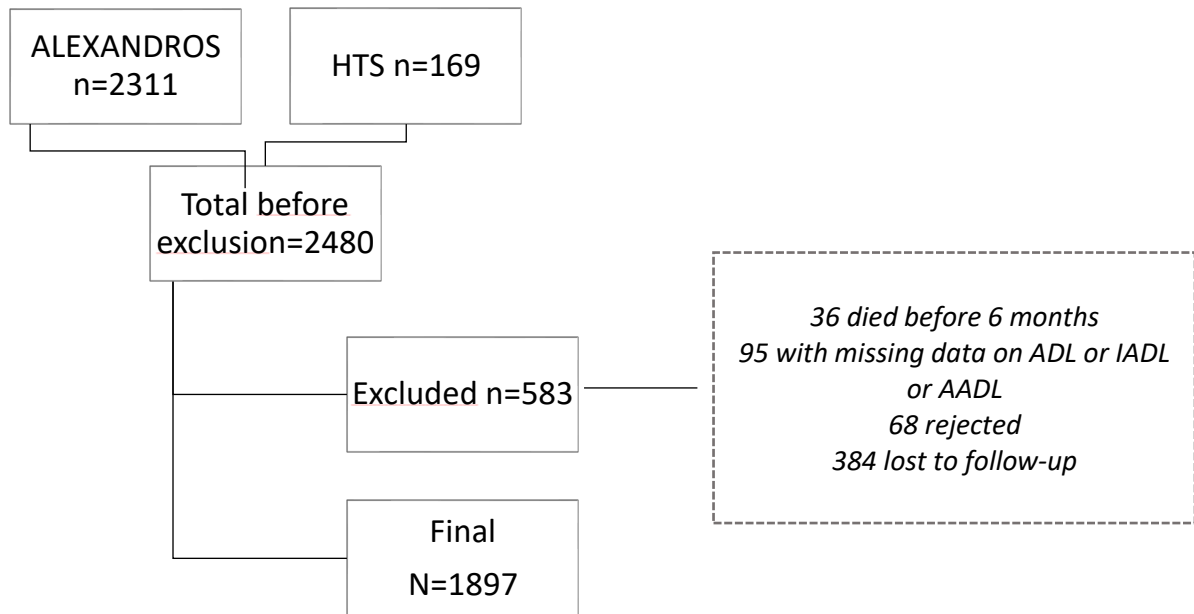

Supplement: Image_1.pdf [file Image_1.pdf]
